# Supplementary material for: Immunogenicity and Protection Efficacy of a Naked Self-Replicating mRNA-Based Zika Virus Vaccine
Source: PubMed Central journal article supplement (PMC6789535; doi:10.3390/vaccines7030096), 2019-08-23
Supplement: vaccines-07-00096-s001.pdf [file vaccines-07-00096-s001.pdf]

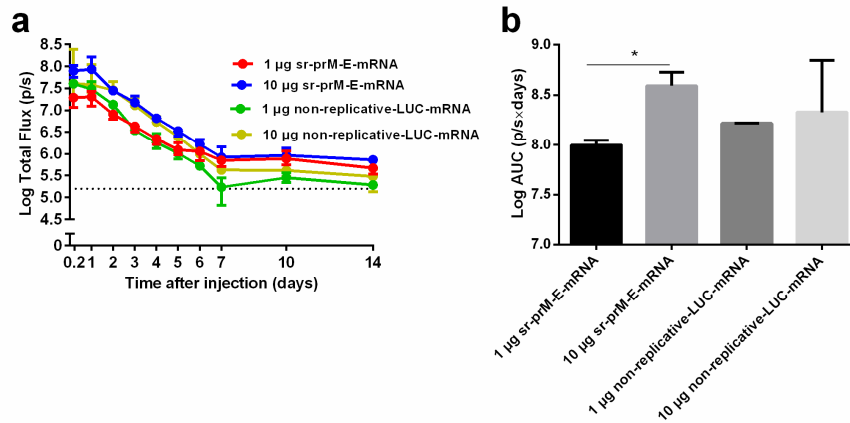

**Figure S1.** The effect of replication of mRNA on the induction of type I interferon in IFN- $\beta$  luciferase reporter mice. (a) IFN- $\beta^{+/Δ\beta-luc}$  mice were intradermally electroporated with 1 or 10  $\mu\text{g}$  of replication-deficient replicon (non-replicative-LUC-mRNA) or replication-competent sr-prM-E-mRNA. The non-replicative-LUC-mRNA was constructed by removal of a fragment of 1404 bp in the sequence encoding nsP2 by the restriction enzyme KpnI and was no longer able to produce luciferase. The type I interferon responses were monitored by measuring the bioluminescent signal at the injection spot for 14 days. The AUC of the curves in (a) are shown in (b) ( $n = 3$ ) (Data are represented as median with interquartile range and were analyzed by ANOVA followed by Tukey's test.).

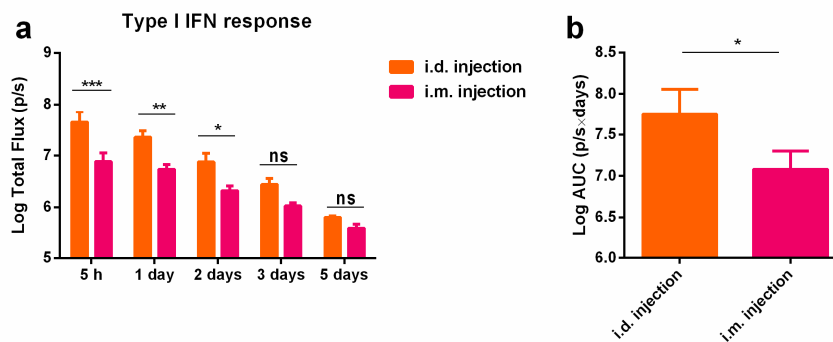

**Figure S2.** The effect of different routes for mRNA delivery on the induction of type I interferon in IFN- $\beta$  luciferase reporter mice. (a) IFN- $\beta^{+/Δ\beta-luc}$  mice were intradermal or intramuscularly injected with 1  $\mu\text{g}$  of sr-prM-E-mRNA. The type I interferon responses were monitored by measuring the bioluminescent signal at the injection for 5 days. The AUC of the curves in (a) are shown in (b) ( $n = 4$ ).

**Table S1.** A scoring system for weight loss and mobility impairment was used to determine survival rates following ZIKV challenge.

| Score | Weight Loss                 | Score | Mobility                                        |
|-------|-----------------------------|-------|-------------------------------------------------|
| 1     | 10%–15% loss of body weight | 1     | Hindlimb weakness or disrupted reighting reflex |
| 2     | 15%–20% loss of body weight | 2     | Partial hindlimb paralysis or toe knuckling     |
| 3     | 20%–25% loss of body weight | 3     | Complete paralysis of one hindlimb              |
| 4     | >25% loss of body weight    | 4     | Complete paralysis of both hindlimbs            |

Mice that lost > 25% of their initial body weight, or showed complete paralysis of both hindlimbs, or that had a combined total score of 4 or more were euthanized and considered dead.

**Table S2.** The significant differences of Figure 4c.

| Days After Administration | 0.2               |                   | 1                 |                   | 2                 |                   | 3                 |                   | 4                 |                 | 5                 |                 |
|---------------------------|-------------------|-------------------|-------------------|-------------------|-------------------|-------------------|-------------------|-------------------|-------------------|-----------------|-------------------|-----------------|
| Significance (P-value)    | 1 $\mu$ g (WT)    | 10 $\mu$ g (WT)   | 1 $\mu$ g (WT)    | 10 $\mu$ g (WT)   | 1 $\mu$ g (WT)    | 10 $\mu$ g (WT)   | 1 $\mu$ g (WT)    | 10 $\mu$ g (WT)   | 1 $\mu$ g (WT)    | 10 $\mu$ g (WT) | 1 $\mu$ g (WT)    | 10 $\mu$ g (WT) |
| 1 $\mu$ g (KO)            | ****<br>(<0.0001) | **<br>(0.0046)    | ****<br>(<0.0001) | *<br>(0.0486)     | ****<br>(<0.0001) | ns                | ****<br>(<0.0001) | ns                | ****<br>(<0.0001) | ns              | ****<br>(<0.0001) | ns              |
| 1 $\mu$ g (WT)            |                   | ****<br>(<0.0001) |                   | ****<br>(<0.0001) |                   | ****<br>(<0.0001) |                   | ****<br>(<0.0001) |                   | **<br>(0.0012)  |                   | **<br>(0.0019)  |
| Days after administration | 6                 |                   | 7                 |                   | 10                |                   | 14                |                   | 21                |                 | 28                |                 |
| Significance (P-value)    | 1 $\mu$ g (WT)    | 10 $\mu$ g (WT)   | 1 $\mu$ g (WT)    | 10 $\mu$ g (WT)   | 1 $\mu$ g (WT)    | 10 $\mu$ g (WT)   | 1 $\mu$ g (WT)    | 10 $\mu$ g (WT)   | 1 $\mu$ g (WT)    | 10 $\mu$ g (WT) | 1 $\mu$ g (WT)    | 10 $\mu$ g (WT) |
| 1 $\mu$ g (KO)            | ****<br>(<0.0001) | ns                | ****<br>(<0.0001) | ns                | ****<br>(<0.0001) | ns                | ns                | ****<br>(<0.0001) | ns                | ***<br>(0.0002) | ns                | ns              |
| 1 $\mu$ g (WT)            |                   | ****<br>(<0.0001) |                   | ***<br>(0.0001)   |                   | ****<br>(<0.0001) |                   | ****<br>(<0.0001) |                   | ns              |                   | ns              |
